# Supplementary material for: Evidence of Egg Diversity in Squamate Evolution from Cretaceous Anguimorph Embryos
Source: PubMed Central journal article supplement (PMC4503689; doi:10.1371/journal.pone.0128610), 2015-07-15

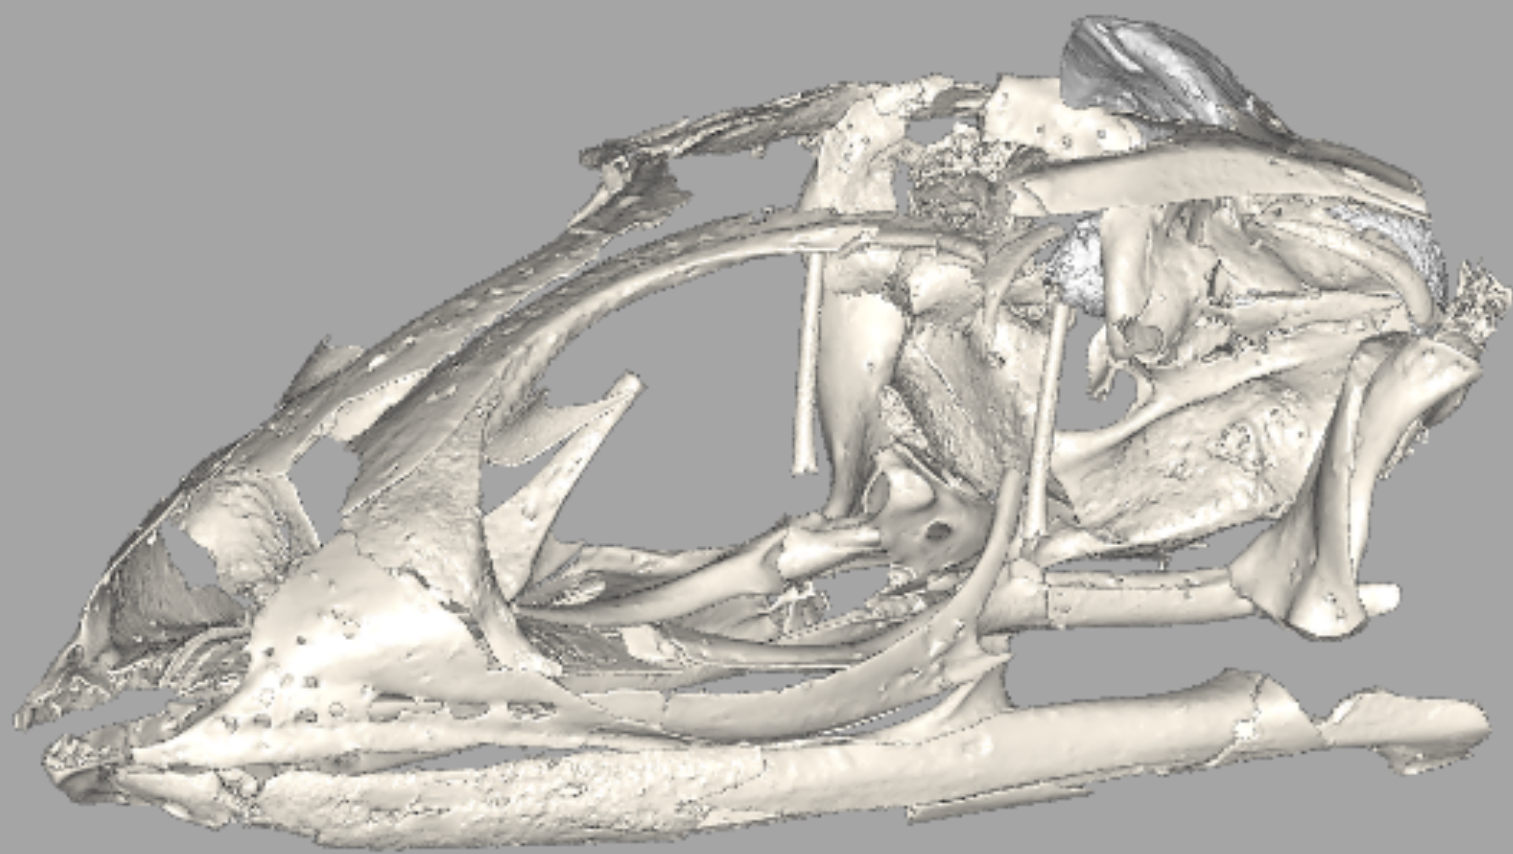

Supplement: pone.0128610.s003.pdf [file pone.0128610.s003.pdf]
